# Supplementary material
Source: PubMed Central journal article supplement (PMC4163973)
Supplement: NIHMS623709-supplement-supplement_1.pdf [file NIHMS623709-supplement-supplement_1.pdf]

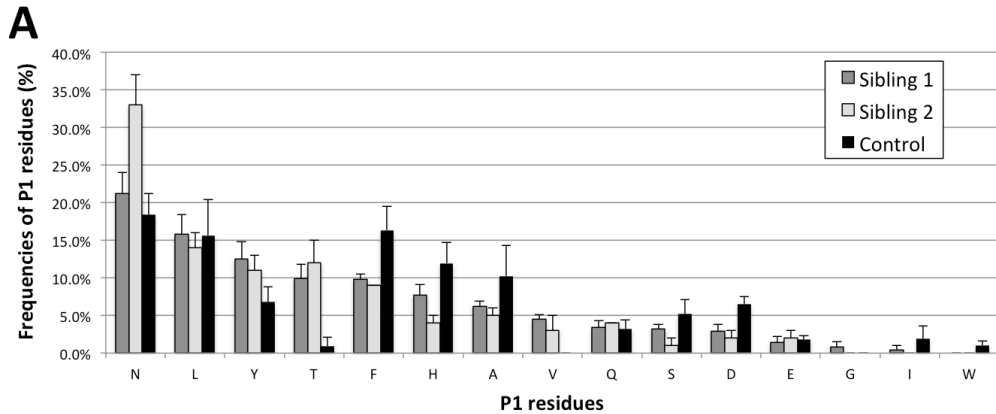

**Supplementary material 1.** Amino acid P1 residue cleavage distribution in TGFBIp. Frequencies of P1 cleavage sites observed in semi-tryptic TGFBIp peptides of amyloid deposits and control tissue. Tissues from both siblings display higher cleavage frequencies after threonine and valine residues and to a less extent after tyrosine residues. Numbers of counted P1 sites were 626 (sibling 1), 527 (sibling), and 282 (control).

**Supplementary material 2.** MS protein and peptide information

**Supplementary material 3.** emPAI quantification and total protein identification list

**Supplementary material 4.** MS/MS spectra of protein hits identified by one peptide

**Table 1:** The 30 most abundant proteins according to emPAI-based molar % identified in corneal amyloid deposits and healthy corneal tissue

| #  | A546D/P551Q<br>(Sibling 1)            |         |        | A546D/P551Q<br>(Sibling 2)               |         |       | Healthy corneal stroma<br>(3 individuals)       |         |       |
|----|---------------------------------------|---------|--------|------------------------------------------|---------|-------|-------------------------------------------------|---------|-------|
|    | Name                                  | Molar % |        | Name                                     | Molar % |       | Name                                            | Molar % |       |
| 1  | TGFB1p                                | 69.5    | ± 11.3 | TGFB1p                                   | 47.0    | ± 7.9 | Collagen alpha-1(I) chain                       | 36.5    | ± 5.8 |
| 2  | Serum amyloid P-component             | 3.0     | ± 1.2  | Collagen alpha-1(I) chain                | 4.1     | ± 0.5 | Collagen alpha-2(I) chain                       | 17.3    | ± 1.5 |
| 3  | Apolipoprotein A-I                    | 2.5     | ± 0.6  | Serum amyloid P-component                | 3.8     | ± 1.0 | TGFB1p                                          | 7.8     | ± 2.0 |
| 4  | Collagen alpha-1(I) chain             | 2.2     | ± 0.4  | Lysozyme C                               | 3.4     | ± 1.5 | Ig kappa chain C region                         | 5.0     | ± 3.0 |
| 5  | Clusterin                             | 2.2     | ± 0.7  | Dermcidin                                | 2.9     | ± 1.9 | Serum albumin                                   | 3.4     | ± 0.3 |
| 6  | Collagen alpha-2(I) chain             | 2.0     | ± 1.0  | Collagen alpha-2(I) chain                | 2.6     | ± 0.3 | Keratocan                                       | 1.8     | ± 0.2 |
| 7  | Serine protease HTRA1                 | 1.4     | ± 0.8  | Clusterin                                | 2.5     | ± 0.7 | Decorin                                         | 1.6     | ± 0.5 |
| 8  | Apolipoprotein A-IV                   | 1.3     | ± 0.5  | Lactotransferrin                         | 2.0     | ± 0.6 | Lumican                                         | 1.4     | ± 0.3 |
| 9  | Dermcidin                             | 1.1     | ± 0.6  | Apolipoprotein A-IV                      | 1.7     | ± 0.5 | Ig kappa chain V-III region SIE                 | 1.3     | ± 0.4 |
| 10 | Apolipoprotein D                      | 0.8     | ± 0.4  | Serine protease HTRA1                    | 1.5     | ± 0.6 | Collagen alpha-3(VI) chain                      | 1.2     | ± 0.2 |
| 11 | Apolipoprotein E                      | 0.8     | ± 0.1  | Thioredoxin                              | 1.1     | ± 0.2 | Ig gamma-1 chain C region                       | 1.1     | ± 0.2 |
| 12 | Protein S100-A8                       | 0.7     | ± 0.5  | Apolipoprotein E                         | 1.0     | ± 0.3 | Ig gamma-3 chain C region                       | 1.1     | ± 0.3 |
| 13 | Serum albumin                         | 0.6     | ± 0.2  | Complement component C9                  | 1.0     | ± 0.2 | Collagen alpha-1(VI) chain                      | 0.9     | ± 0.1 |
| 14 | Lysozyme C                            | 0.6     | ± 0.4  | Apolipoprotein A-I                       | 1.0     | ± 0.3 | Ig lambda-2 chain C regions                     | 0.8     | ± 0.4 |
| 15 | Prostaglandin-H2 D-isomerase          | 0.5     | ± 0.3  | Apolipoprotein D                         | 0.9     | ± 0.2 | Ig kappa chain V-III region NG9                 | 0.8     | ± 0.4 |
| 16 | Lumican                               | 0.5     | ± 0.2  | Fatty acid-binding protein, epidermal    | 0.8     | ± 0.2 | Aldehyde dehydrogenase, dimeric NADP-preferring | 0.7     | ± 0.1 |
| 17 | Protein S100-A9                       | 0.4     | ± 0.2  | Actin, cytoplasmic 1                     | 0.8     | ± 0.2 | Collagen alpha-2(VI) chain                      | 0.7     | ± 0.2 |
| 18 | Ig gamma-1 chain C region             | 0.4     | ± 0.1  | Vimentin                                 | 0.7     | ± 0.2 | Vimentin                                        | 0.7     | ± 0.1 |
| 19 | Histone H4                            | 0.4     | ± 0.1  | Cystatin-A                               | 0.7     | ± 0.4 | Collagen alpha-1(XII) chain                     | 0.6     | ± 0.1 |
| 20 | Ubiquitin-40S ribosomal protein S27a  | 0.4     | ± 0.3  | Ig gamma-1 chain C region                | 0.6     | ± 0.2 | Collagen alpha-2(V) chain                       | 0.6     | ± 0.2 |
| 21 | Complement component C9               | 0.4     | ± 0.1  | Olfactomedin-like protein 3              | 0.6     | ± 0.2 | Ig gamma-4 chain C region                       | 0.5     | ± 0.1 |
| 22 | Olfactomedin-like protein 3           | 0.3     | ± 0.1  | Protein S100-A6                          | 0.6     | ± 0.1 | Prostaglandin-H2 D-isomerase                    | 0.5     | ± 0.2 |
| 23 | Angiopoietin-related protein 7        | 0.3     | ± 0.2  | Cytokine-like protein 1                  | 0.6     | ± 0.2 | MAM domain-containing protein 2                 | 0.4     | ± 0.1 |
| 24 | Keratocan                             | 0.3     | ± 0.1  | Ubiquitin-40S ribosomal protein S27a     | 0.6     | ± 0.3 | Histone H4                                      | 0.4     | ± 0.1 |
| 25 | Decorin                               | 0.3     | ± 0.2  | Histone H4                               | 0.5     | ± 0.1 | Dermcidin                                       | 0.4     | ± 0.1 |
| 26 | Ig alpha-1 chain C region             | 0.3     | ± 0.1  | Protein S100-A8                          | 0.5     | ± 0.1 | Collagen alpha-1(V) chain                       | 0.4     | ± 0.1 |
| 27 | Phospholipase A2, membrane associated | 0.2     | ± 0.1  | Ig kappa chain V-III region VG           | 0.5     | ± 0.1 | Protein S100-A6                                 | 0.4     | ± 0.2 |
| 28 | Cytokine-like protein 1               | 0.2     | ± 0.1  | Glyceraldehyde-3-phosphate dehydrogenase | 0.5     | ± 0.3 | Ig alpha-1 chain C region                       | 0.4     | ± 0.2 |
| 29 | Fatty acid-binding protein, epidermal | 0.2     | ± 0.1  | Prostaglandin-H2 D-isomerase             | 0.5     | ± 0.2 | Alpha-enolase                                   | 0.3     | ± 0.1 |
| 30 | Actin, cytoplasmic 1                  | 0.2     | ± 0.1  | Metalloproteinase inhibitor 3            | 0.5     | ± 0.2 | Collagen alpha-1(III) chain                     | 0.3     | ± 0.1 |
